# Supplementary material
Source: publisher site journal article supplement (https://www.dovepress.com/article/221040)

## Supplementary Figure Legends

Supplementary Figure 1.  $\alpha$ LMP1-specific CAR surface expression in primary human T cells. a. Expression was examined 8 days after transduction with the indicated CAR-encoding lentiviral by detecting Fc and scFv expression on cell surface using flow cytometry. b. ZsGreen expression of CART cell for cultured 6 weeks.

Supplementary Figure 2. LMP1 surface expression on human nasopharyngeal carcinoma and B cell lymphoma cell lines determined by flow cytometry. LMP1-specific F(ab)<sub>2</sub> and anti-Fab FITC were used to measure LMP1 expression in tumor cell lines (red line histogram) and were compared with anti-Fab FITC only as a control (blue line histogram).

Supplementary Figure 3. Cytotoxic activity of HELA/CAR co-cultured with SUNE1 cells. On day 10, transduced cells were transferred into IL-2-free medium for 24 hours, the HELA/CAR T cells were incubated with SUNE1 cells at the indicated E:T ratio for 4 hours, and killing of target cells was quantified using a FACS-based cytotoxicity assay. Mean values  $\pm$ SEM calculated from three independent experiments are shown.

Supplementary Figure 4. CART cells produced IFN- $\gamma$  and IL-2 co-culture with SUNE1 or LCL. a and c HELA/CAR T cells released significant

23 amounts of IFN- $\gamma$  when co-cultured with SUNE1 and LCL cells. The  
24 results are expressed as the mean $\pm$ SEM and reflect data from three  
25 biological replicates. The x-axis indicates the concentration of IFN- $\gamma$ . b and  
26 d. HELA/CAR T cells released significant amounts of IL-2 when co-  
27 cultured with SUNE1 and LCL cells. The results are expressed as the  
28 mean $\pm$ SEM and reflect data from three biological replicates. The x-axis  
29 indicates the concentration of IL-2. \*\*  $p < 0.01$ .

30

Supplementary Fig.1

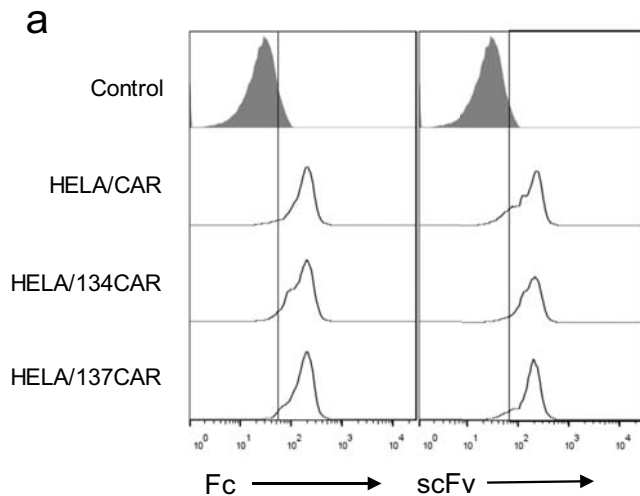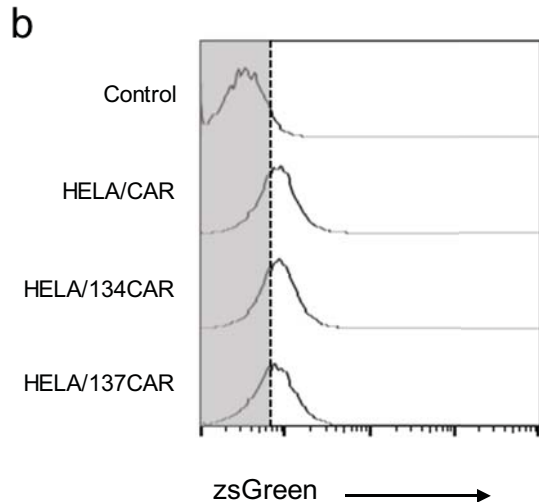

## Supplementary Fig.2

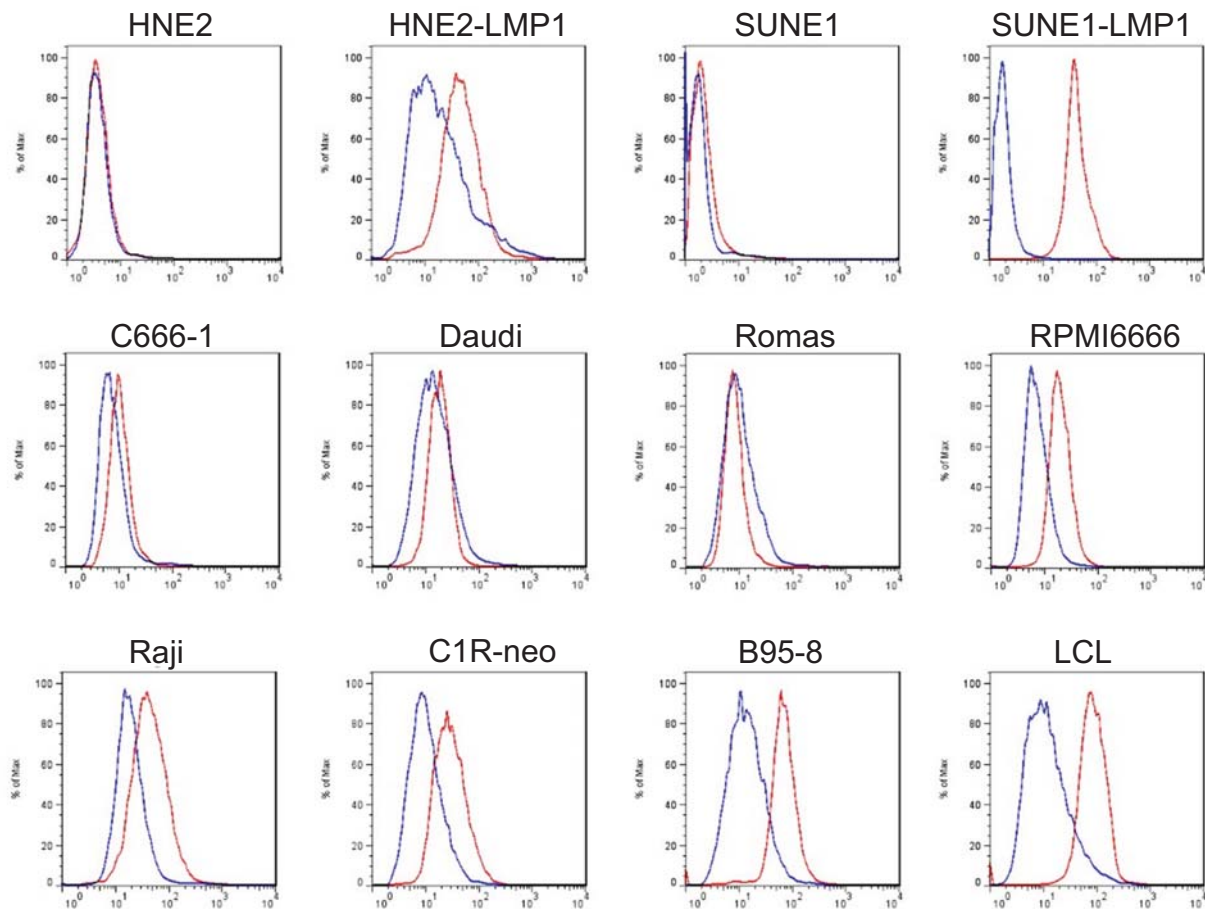

Supplementary Fig.3

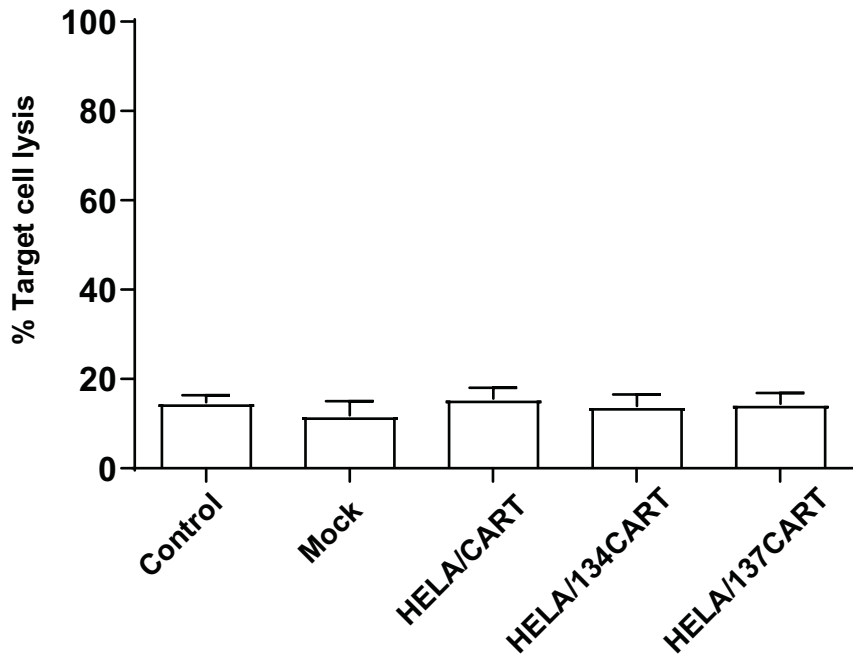

Supplementary Fig.4

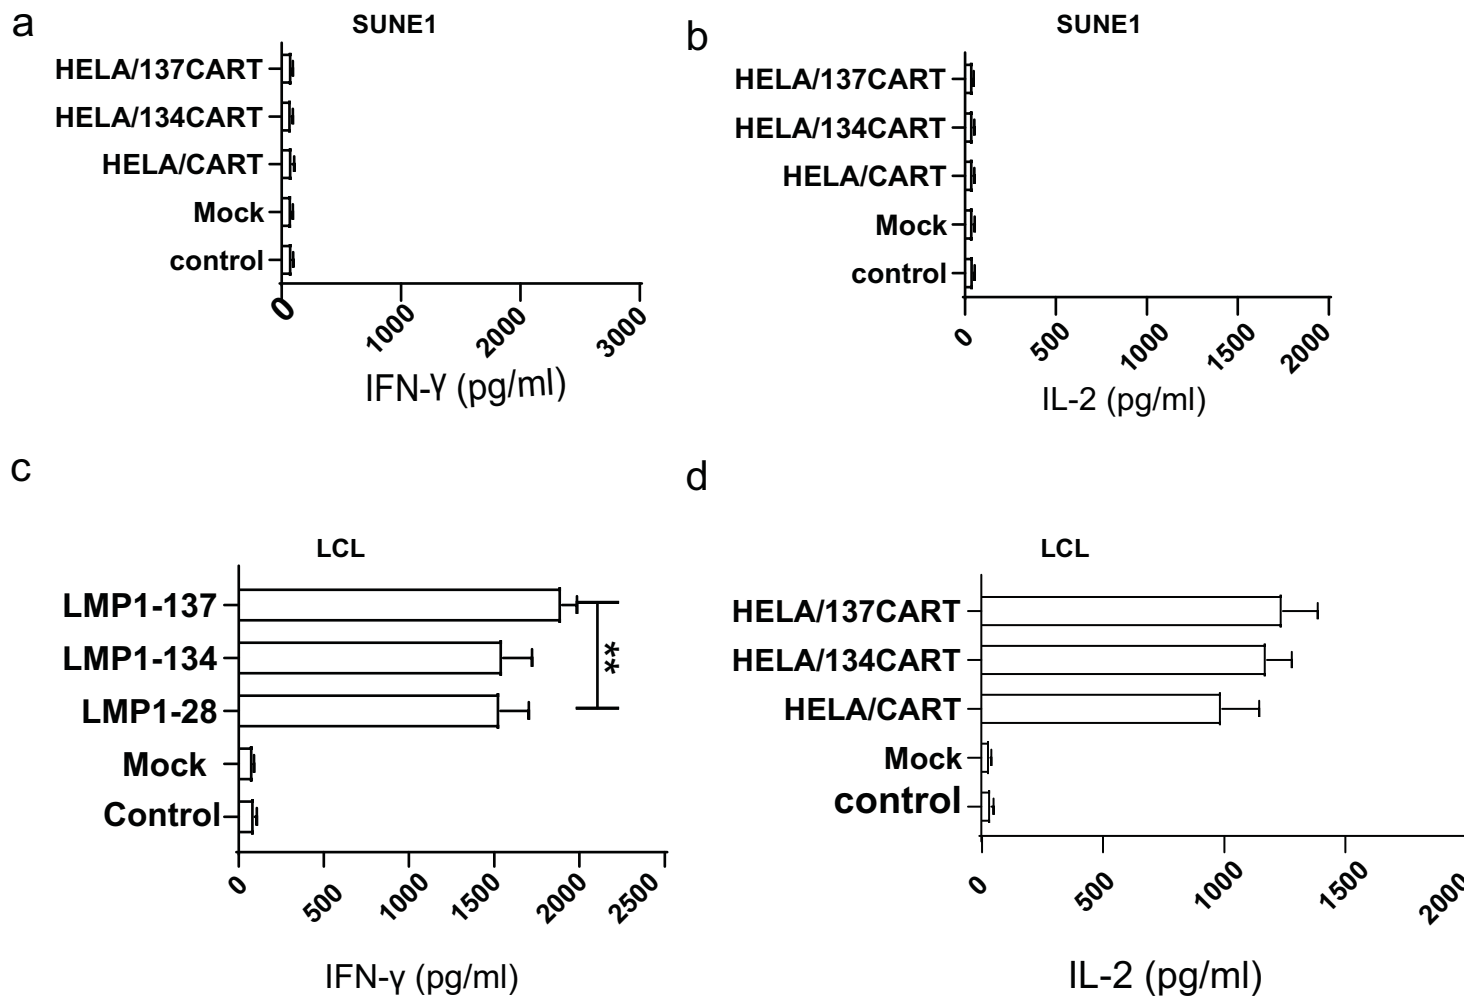

Supplement: Supplementary file 1 [file get_supplementary_file.php]
